# Supplementary material for: Preliminary Analysis of Excess Mortality in India During the COVID-19 Pandemic
Source: PubMed Central journal article supplement (PMC9128677; doi:10.4269/ajtmh.21-0864), 2022-04-04
Supplement: tpmd210864.SD1.pdf [file tpmd210864.SD1.pdf]

## **Supplemental Appendix**

### **Supplement to Methods.**

This supplemental section elaborates on the methods with greater specificity.

#### **Sources of All-Cause Mortality Data.**

We used the publicly available mortality figures published by regional governments and by data journalists in India, often obtained from Right-to-Information (RTI) requests (Supplemental References, Tables S1, S2). Much of these data are stored on the websites maintained by the Local Mortality project of Ariel Karlinsky (Karlinsky 2020, Karlinsky 2021), or the Development Data Lab (2021). These were supplemented by data from government hospitals, funeral counts, and handwritten death registers when available, as detailed below.

We acquired mortality data from 19 states (or union territories) with 1.27 billion population, either for the entire state, or for large cities or districts within the state: Andhra Pradesh, Assam, Bihar, Chandigarh, Delhi, Gujarat, Haryana, Himachal Pradesh, Karnataka, Kerala, Madhya Pradesh, Maharashtra, Odisha, Punjab, Rajasthan, Tamil Nadu, Telangana, Uttar Pradesh, and West Bengal (Tables 1, S1). As a convenient shorthand, we refer to these 19 administrative regions as “states”, even though two of them (Chandigarh and Delhi) are actually union territories. The inclusion of a state or large city in the analysis was based on whether reliable mortality data were available. Some smaller states were not included because governments, reporters, nonprofits and academicians have not yet published relevant mortality data for the pandemic period.

All of these publicly available regional-level mortality data contain no individually-identifiable information. The study was approved by the Office of Research Subjects Protection of Virginia Commonwealth University.

For Chhattisgarh, mortality data from the online portal of the state civil registration system have been released (Data Development Lab), and we included these data in the appendix. However, as the baseline data for this online portal appear to be only about one tenth complete, as compared with the national vital statistics registry, we deemed the Chhattisgarh data too unreliable to include in the model.

For Gujarat, journalists tabulated deaths from March 2020 through April 2021 for 68 of the 170 municipalities, which comprised 6.01% of the state’s population, from the bound handwritten official municipal death registers (Table S2, Supplemental References). For 3 of these Gujarat municipalities (Chorvad, Idar, and Khedabrahma), death register data were available from May 1 to June 10, 2021.

For the urban portions of 25 districts in Madhya Pradesh, the numbers of funerals in April 2021 have been tabulated (Supplemental References).

For Uttar Pradesh, the raw mortality data obtained from a Right-to-Information request contained anomalies, such as multiple districts with zero deaths for numerous months. Therefore, the Uttar Pradesh data were analyzed, but were not included in the top-line model.

### **Reported Covid-19 Mortality.**

Mortality attributed to Covid-19 has been tabulated by the Johns Hopkins University Center for Systems Science and Engineering (CSSE, Table S3, Johns Hopkins University 2021). The CSSE obtains Covid mortality data from the governmental health authorities of the respective countries (Dong 2020). In the case of India, the CSSE links to the Covid-19 webpage for the Government of India Health Ministry (2021). According to reports, local physicians and health authorities in India were in some cases not reporting deaths as caused by Covid-19 if SarsCov-2 tests were not performed or if the patient had contributing comorbidities (Prasad 2021).

### **Analysis of Mortality.**

We assumed that the CSSE figures for Covid-19 mortality accurately reflected the pandemic-related mortality in a given state for each year of the pandemic (2020 and 2021), unless the excess mortality data suggested a higher toll.

For some states, several data sources were available, which permitted the calculation of multiple estimates of per-capita excess mortality. In this case, we presented both the median estimate and the lowest and highest estimates available.

For Gujarat and the urban portions of 25 districts in Madhya Pradesh, mortality data from entire year(s) before 2020 were available (Government of India. Office of the Registrar General 2019). Therefore, to estimate excess mortality for portions of 2021 for these regions, it was necessary to assume that mortality was evenly distributed throughout the year.

For the analysis of data from 68 municipalities in Gujarat, the per-capita mortality for 2021 was estimated by summing the mortality rate through April 2021 with that from available municipalities for May 1 through June 10 (Table S2).

We calculated excess mortality in a region by comparing the mortality for a given time period in 2020 or 2021 with the value expected based on the years 2015 to 2019 (Karlinsky 2020). If data from more than one year before 2019 were available, the expected value was calculated by creating a trend line for mortality by linear regression for the years 2015 to 2019, and carrying this trend one year (for 2020) or two years (for 2021) into the future. Carrying the trend line two years into the future for 2021 yielded conservative estimates of excess deaths.

For some states, reported mortality from the state government websites or RTI requests was only available for 2018 and 2019, which was too short a period to

generate a robust trend line. Moreover, the numbers of deaths from the state sources did not match the central government figures exactly, because the state information systems did not capture all of the registered deaths. In these cases, the vital statistics reports for India were used to generate a trend line for expected deaths, using the data from 2015 to 2019. The expected number of deaths was scaled up or down by multiplying the 2015 to 2019 trend line by the ratio of deaths in the state and federal systems for 2018 and 2019. For instance, if the state website average mortality for 2018 and 2019 was 97% of the figures for 2018 and 2019 in the federal reports, the trend line was multiplied by 0.97. This method was used to scale the trend line for Delhi, Bengaluru, Mumbai, Nagpur, Ahmedabad (for 2020), Madhya Pradesh, Tamil Nadu, for 6 city hospitals in Tamil Nadu, and for Madurai district.

Completeness of death registrations for each state has been estimated by the Indian government in its vital statistics reports by dividing the number of registrations by the state mortality estimated from the Sample Registration System, an annual survey (Table S2, Government of India. Office of the Registrar General 2019). For years in which the completeness was less than 100%, the total number of deaths for each year 2015 to 2019 was determined by dividing the death registrations by the completeness fraction. Unlike the trend line for unadjusted death registrations, the trend line for the adjusted registrations did decrease over time for some states. In order to ensure the estimated excess deaths were conservative, the expected deaths for 2020 and 2021 were the maximum of the 2019 value and the value predicted by the trend line. The completeness fraction for 2020 and 2021 was extrapolated by linear regression from the 2015 to 2019 completeness fraction. Once again, in order to be conservative, the maximum of the 2019 value and the linear extrapolation was used.

The national mortality rate was estimated by summing the estimated pandemic-related deaths for the states analyzed and then dividing by the population of these states. The population size of Indian states was taken from the Hopkins mortality dataset (Johns Hopkins University 2021). Raw data are tabulated in the appendix (Table S2).

### **Graphical analysis of mortality.**

In order to present the timing of the mortality graphically, the per-capita mortality rates (total monthly deaths divided by total population) were calculated for the states for which monthly data were available from Jan 2019 through May 2021 (Andhra Pradesh, Bihar, Chandigarh, Delhi, Haryana, Himachal Pradesh, Karnataka, Kerala, Madhya Pradesh, Maharashtra, Punjab, Rajasthan, Tamil Nadu, and West Bengal). For subsequent months, the per-capita mortality was calculated from states with data available (Punjab through June 2021, Andhra Pradesh through July 2021, Karnataka and Tamil Nadu through August 2021, and Odisha in July and August 2021). For the purposes of generating this figure, the Odisha cumulative annual mortality for August 1, 2021 was estimated by linear interpolation from the July 1 and August 8 values. This

graphical analysis was completely separate from the tabulated estimate of total mortality in India.

## **Acknowledgments.**

The authors would like to acknowledge the data journalists, academicians, and nonprofits in India who have brought these data to light, such as Rukmini S. (@Rukmini), Chinmay Tumble (@ChinmayTumble), Vignesh Radhakrishnan (@VigneshJourno), Srinivasan Ramani (@vrsrini), Deepak Patel (@deepakpatel\_91), Murad Banaji (@muradbanaji), Sumitra Debroy (@debroysumitra), Dhanya Rajendran (@dhanyarajendran), Shiba Kurian (@shiba\_kurian), and Arappor Iyakkam. In addition, we acknowledge the important work of Ariel Karlinsky and colleagues, and the Development Data Lab for preparing many of the mortality databases we used. However, all errors in the paper are the responsibility of the authors.

**Supplemental Table S1. Excess mortality in India, January 2020-August 2021.**

| State            | Region.                | Population  | Excess deaths |              | Excess mortality / 100K |              | Final 2021 Date |
|------------------|------------------------|-------------|---------------|--------------|-------------------------|--------------|-----------------|
|                  |                        |             | 2020          | Jan-Aug 2021 | 2020                    | Jan-Aug 2021 |                 |
| Andhra Pradesh   |                        | 53,903,393  | 65,493        | 173,446      | 121.501                 | 321.772      | 7/31            |
| Assam            |                        | 35,607,039  | 15,246        | --           | 42,819                  | --           | --              |
| Bihar            |                        | 124,799,930 | 134,244       | 126,388      | 107.567                 | 101.272      | 5/31            |
| Chandigarh       |                        | 11,584,730  | -8,238        | -2,707       | -71.114                 | -23.368      | 5/31            |
| Delhi            |                        | 18,710,920  | 1,202         | 43,099       | 6.421                   | 230.342      | 6/30            |
| Gujarat          | Entire state           | 63,872,400  | -70,333       | 32,376       | -110.115                | 50.688       | 5/10            |
|                  | Ahmedabad              | 8,059,000   | 5,276         | 2,935        | 65.466                  | 36.417       | 5/10            |
|                  | 68 cities              | 3,838,730   | 7,004         | 9,908        | 182.464                 | 258.094      | 4/30            |
|                  | 3 cities               | 83,900      | --            | 145          | --                      | 172.295      | 6/10            |
|                  | 68 cities              | 3,838,730   | --            | --           | --                      | 430.389      | 6/10            |
| Haryana          |                        | 28,204,692  | 11,087        | 41,026       | 39.311                  | 145.458      | 5/31            |
| Himachal Pradesh |                        | 7,451,955   | 291           | 2,976        | 3.902                   | 39.930       | 5/31            |
| Karnataka        | Entire state           | 67,562,700  | 12,627        | 111,876      | 18.689                  | 165.588      | 8/30            |
|                  | Bengaluru              | 8,443,675   | 6,510         | 54,740       | 77.103                  | 648.291      | 6/15            |
| Kerala           | Entire state           | 35,699,440  | -27,367       | 6,484        | -76.659                 | 18.163       | 5/31            |
| Madhya Pradesh   | Entire state           | 85,358,970  | -28,598       | 181,159      | -33.503                 | 212.232      | 5/31            |
|                  | 25 districts           | 25,412,510  | --            | 11,785       | --                      | 46.376       | 4/30            |
| Maharashtra      | State less 6 districts | 102,598,050 | 103,152       | 104,946      | 100.540                 | 102.288      | 5/31            |
|                  | Mumbai city            | 12,875,213  | 17,641        | 6,467        | 137.018                 | 50.227       | 5/31            |
|                  | Nagpur city            | 2,405,000   | 4,144         | --           | 172.308                 | --           |                 |
| Odisha           |                        | 46,356,334  | 20,035        | 58,238       | 43.220                  | 125.631      | 8/31            |
| Punjab           |                        | 30,141,373  | -11,415       | 36,247       | -37.873                 | 120.255      | 6/30            |
| Rajasthan        |                        | 81,032,689  | 6,629         | 32,311       | 8.181                   | 39.874       | 5/31            |
| Tamil Nadu       | Chennai                | 7,088,000   | 5,921         | 19,199       | 83.540                  | 270.866      | 8/01            |
|                  | Entire state           | 77,841,270  | 72,052        | 206,274      | 92.563                  | 264.993      | 8/31            |
|                  | 6 cities               | 5,980,370   | -1,032        | 14,160       | -17.261                 | 236.776      | 5/31            |
|                  | Madurai                | 3,038,250   | 2,018         | 2,325        | 66.412                  | 76.508       | 5/31            |
| Telangana        | Hyderabad              | 9,482,000   | 8,359         | 6,805        | 88.157                  | 71.768       | 5/31            |
| Uttar Pradesh    |                        | 237,882,725 | -37,468       | 48,458       | -15.751                 | 20.371       | 4/30            |
| West Bengal      | Entire state           | 99,609,300  | 53,355        | 49,122       | 53.564                  | 49.315       | 5/31            |
|                  | Kolkata                | 4,496,694   | 2,075         | 2,901        | 46.145                  | 64.514       | 5/23            |

Data sources listed in supplemental references for: Andhra Pradesh (Banaji), Delhi (Radhakrishnan), Kolkata (Karlinsky), Bengaluru (Chatterjee 2021), Tamil Nadu (crstn.org), Madurai district (Radhakrishnan 2021), Kerala (devdatalab), Uttar Pradesh data (Das), Rajasthan (devdatalab), Haryana (Ramani), Punjab (Ramani), and Himachal Pradesh (Ramani). Gujarat 2020 data available Jan.-Nov. Ahmedabad 2020 data available Apr.-May. Gujarat, including Ahmedabad, 2021 mortality available from Mar 1 to May 10, 2021. Death register data from 68 municipalities in Gujarat, with 6.01% of state population, available through April 2021 (Jalihal 2021). Mortality data for May 1 to June 10, 2021 were available from 3 municipalities in Gujarat (Chorvad, Idar, Khedbrahma) with 0.131% of the state population (wallofgrief.org). Nagpur data available Apr. to Dec. 2020. The 6 government hospitals in Tamil Nadu studied by Arappor Iyakkam from Jan-May in 2020 and 2021 were in Madurai, Coimbatore, Trichy, Vellore, Karur, and Tirupur. The urban areas in Madhya Pradesh from which funeral counts were tabulated for April 2021 were from the following 25 districts: Barwani, Bhind, Bhopal, Burhanpur, Chhatarpur, Chhindwara, Dewas, Dhar, Gwalior, Indore, Jabalpur, Jhabua, Khandwa, Mandasaur, Morena, Neemuch, Ratlam, Sagar, Satna, Seoni, Shahdol, Shivpuri, Singroli, Tikamgarh, Vidisha (Datta 2021).

Maharashtra data did not include 6 districts: Pune, Satara, Sangli, Yavatmal, Sindhudurg and Gondiya (Ramani). State populations were obtained from the Johns Hopkins University Center for Systems Science and Engineering dataset.

**Supplemental Table S2. Time Series of Mortality from Selected Regions in India.**

| Region         | Year | Period      | Deaths  | Regist-<br>ration<br>Comp-<br>leteness | Reference         |
|----------------|------|-------------|---------|----------------------------------------|-------------------|
| Andhra Pradesh | 2015 | All         | 310,640 | 0.849                                  | Vital Statistics  |
| Andhra Pradesh | 2016 | All         | 313,285 | 0.887                                  | Vital Statistics  |
| Andhra Pradesh | 2017 | All         | 355,546 | 0.944                                  | Vital Statistics  |
| Andhra Pradesh | 2018 | All         | 375,777 | 1.000                                  | Vital Statistics  |
| Andhra Pradesh | 2019 | All         | 401,472 | 1.000                                  | Vital Statistics  |
| Andhra Pradesh | 2018 | All         | 333,275 |                                        | Rukmini "AP"      |
| Andhra Pradesh | 2019 | All         | 363,414 |                                        | Rukmini "AP"      |
| Andhra Pradesh | 2020 | All         | 428,907 |                                        | Rukmini "AP"      |
| Andhra Pradesh | 2018 | Months 1-7  | 193,698 |                                        | Banaji (github)   |
| Andhra Pradesh | 2019 | Months 1-7  | 206,461 |                                        |                   |
| Andhra Pradesh | 2020 | Months 1-7  | 198,030 |                                        |                   |
| Andhra Pradesh | 2021 | Months 1-7  | 385,608 |                                        |                   |
| Assam State    | 2015 | All         | 116,778 | 0.511                                  | Vital Statistics  |
| Assam State    | 2016 | All         | 130,414 | 0.598                                  | Vital Statistics  |
| Assam State    | 2017 | All         | 141,012 | 0.659                                  | Vital Statistics  |
| Assam State    | 2018 | All         | 142,605 | 0.669                                  | Saikia, Vital St. |
| Assam State    | 2019 | All         | 163,057 | 0.740                                  | Saikia, Vital St. |
| Assam State    | 2020 | All         | 187,085 |                                        | Saikia            |
| Bihar          | 2015 | All         | 204,093 | 0.319                                  | Vital Statist.    |
| Bihar          | 2016 | All         | 177,021 | 0.283                                  | Vital Statist.    |
| Bihar          | 2017 | All         | 261,425 | 0.427                                  | Vital Statist.    |
| Bihar          | 2018 | All         | 213,989 | 0.346                                  | Vital Statist.    |
| Bihar          | 2019 | All         | 359,349 | 0.516                                  | Vital Statist.    |
| Bihar          | 2018 | Entire year | 182,921 |                                        | devdatalab        |
|                | 2019 | Entire year | 351,274 |                                        | devdatalab        |
|                | 2020 | Entire year | 387,429 |                                        | devdatalab        |
| Bihar          | 2018 | Jan-May     | 45,487  |                                        | devdatalab        |
|                | 2019 | Jan-May     | 133,224 |                                        | devdatalab        |



|              |      |             |         |       |                                             |
|--------------|------|-------------|---------|-------|---------------------------------------------|
|              | 2020 | Jan-May     | 138,693 |       | devdatalab                                  |
|              | 2021 | Jan-May     | 215,746 |       | devdatalab                                  |
| Chandigarh   | 2015 | Entire year | 16,203  | 1.000 | Vital Statistics                            |
| Chandigarh   | 2016 | Entire year | 16,570  | 1.000 | Vital Statistics                            |
| Chandigarh   | 2017 | Entire year | 21,236  | 1.000 | Vital Statistics                            |
| Chandigarh   | 2018 | Entire year | 23,330  | 1.000 | Vital Statistics                            |
| Chandigarh   | 2019 | Entire year | 23,592  | 1.000 | Vital Statistics                            |
| Chandigarh   | 2018 | Entire year | 23,228  |       | Banaji                                      |
| Chandigarh   | 2019 | Entire year | 23,352  |       | Banaji                                      |
| Chandigarh   | 2020 | Entire year | 18,215  |       | Banaji                                      |
| Chandigarh   | 2018 | Jan-May     | 9,367   |       | Banaji                                      |
| Chandigarh   | 2019 | Jan-May     | 9,748   |       | Banaji                                      |
| Chandigarh   | 2020 | Jan-May     | 7,641   |       | Banaji                                      |
| Chandigarh   | 2021 | Jan-May     | 9,026   |       | Banaji                                      |
| Chhattisgarh | 2018 | Entire year | 15,690  |       | Online portal of the state CRS (devdatalab) |
| Chhattisgarh | 2019 | Entire year | 15,607  |       |                                             |
| Chhattisgarh | 2020 | Entire year | 63,237  |       |                                             |
| Chhattisgarh | 2018 | Months 1-5  | 6,802   |       | Online portal of the state CRS (devdatalab) |
| Chhattisgarh | 2019 | Months 1-5  | 5,623   |       |                                             |
| Chhattisgarh | 2020 | Months 1-5  | 17,497  |       |                                             |
| Chhattisgarh | 2021 | Months 1-5  | 106,832 |       |                                             |
| Chhattisgarh | 2015 | Entire year | 168,034 | 0.875 | Vital Statistics                            |
| Chhattisgarh | 2016 | Entire year | 182,985 | 0.952 | Vital Statistics                            |
| Chhattisgarh | 2017 | Entire year | 175,035 | 0.888 | Vital Statistics                            |
| Chhattisgarh | 2018 | Entire year | 177,549 | 0.835 | Vital Statistics                            |
| Chhattisgarh | 2019 | Entire year | 188,211 | 0.815 | Vital Statistics                            |
| Delhi        | 2015 | All         | 124,516 | 1.000 | Vital Statistics                            |
| Delhi        | 2016 | All         | 141,632 | 1.000 | Vital Statistics                            |
| Delhi        | 2017 | All         | 136,117 | 1.000 | Vital Statistics                            |
| Delhi        | 2018 | All         | 145,533 | 1.000 | Vital Statistics                            |
| Delhi        | 2019 | All         | 145,284 | 1.000 | Vital Statistics                            |
| Delhi        | 2019 | Apr-May     | 19,047  |       | Hindust. Tim.                               |
| Delhi        | 2020 | Apr-May     | 10,258  |       | Hindust. Tim.                               |
| Delhi        | 2021 | Apr-May     | 33,109  |       | Hindust. Tim.                               |
| Delhi        | 2018 | Entire year | 145,533 |       | Radhakrishnan                               |
| Delhi        | 2019 | Entire year | 145,284 |       | Radhakrishnan                               |
| Delhi        | 2020 | Entire year | 153,449 |       | Radhakrishnan                               |
| Delhi        | 2018 | Jan-Jun     | 74,063  |       | Radhakrishnan                               |
| Delhi        | 2019 | Jan-Jun     | 74,464  |       | Radhakrishnan                               |
| Delhi        | 2020 | Jan-Jun     | 70,144  |       | Radhakrishnan                               |
| Delhi        | 2021 | Jan-Jun     | 123,176 |       | Radhakrishnan                               |
| Gujarat      | 2015 | All         | 412,322 | 1.000 | Vital Statistics                            |
| Gujarat      | 2016 | All         | 417,835 | 1.000 | Vital Statistics                            |
| Gujarat      | 2017 | All         | 388,316 | 0.982 | Vital Statistics                            |
| Gujarat      | 2018 | All         | 433,256 | 1.000 | Vital Statistics                            |

|                                    |      |                |         |       |                  |
|------------------------------------|------|----------------|---------|-------|------------------|
| Gujarat                            | 2019 | All            | 462,284 | 1.000 | Vital Statistics |
| Gujarat                            | 2017 | Jan 1-Nov 30   | 368,000 |       | Dave             |
| Gujarat                            | 2018 | Jan 1-Nov 30   | 393,000 |       | Dave             |
| Gujarat                            | 2019 | Jan 1-Nov 30   | 419,000 |       | Dave             |
| Gujarat                            | 2020 | Jan 1-Nov 30   | 374,000 |       | Dave             |
| Gujarat                            | 2020 | Mar. 1-May 10  | 58,000  |       | Desai            |
| Gujarat                            | 2021 | Mar. 1-May 10  | 123,871 |       | Desai            |
| Gujarat: 68 municipalities         | 2019 | Entire year    | 33,362  |       | Jalihal          |
|                                    | 2020 | Entire year    | 40,117  |       | Jalihal          |
|                                    | 2019 | Jan-Apr        | 11,354  |       | Jalihal          |
|                                    | 2020 | Jan-Apr        | 11,364  |       | Jalihal          |
|                                    | 2021 | Jan-Apr        | 21,460  |       | Jalihal          |
| Gujarat: Chorvad, Idar, Khedbrahma | 2019 | May 1- June 10 | 82      |       | wallofgrief.org  |
|                                    | 2020 |                | 96      |       | wallofgrief.org  |
|                                    | 2021 |                | 228     |       | wallofgrief.org  |
| Gujarat: Ahmedabad                 | 2017 | Mar. 1-May 10  | 9,319   |       | Opindia          |
|                                    | 2018 | Mar. 1-May 10  | 9,866   |       | Opindia          |
|                                    | 2019 | Mar. 1-May 10  | 9,950   |       | Opindia          |
|                                    | 2020 | Mar. 1-May 10  | 7,786   |       | Opindia          |
|                                    | 2021 | Mar. 1-May 10  | 13,593  |       | Opindia          |
| Gujarat: Ahmedabad                 | 2019 | Apr-May        | 5,490   |       | Khanna           |
|                                    | 2020 | Apr-May        | 10,708  |       | Khanna           |
| Haryana                            | 2015 | Entire year    | 168,910 | 1.000 | Vital Statistics |
|                                    | 2016 | Entire year    | 181,138 | 1.000 | Vital Statistics |
|                                    | 2017 | Entire year    | 174,937 | 1.000 | Vital Statistics |
|                                    | 2018 | Entire year    | 185,842 | 1.000 | Vital Statistics |
|                                    | 2019 | Entire year    | 188,910 | 1.000 | Vital Statistics |
| Haryana                            | 2018 | Entire year    | 178,536 |       | Ramani           |
|                                    | 2019 | Entire year    | 184,155 |       | Ramani           |
|                                    | 2020 | Entire year    | 198,223 |       | Ramani           |
| Haryana                            | 2018 | Jan-May        | 74,816  |       | Ramani           |
|                                    | 2019 | Jan-May        | 76,870  |       | Ramani           |
|                                    | 2020 | Jan-May        | 78,030  |       | Ramani           |
|                                    | 2021 | Jan-May        | 121,100 |       | Ramani           |

|                      |      |               |         |       |                                                   |
|----------------------|------|---------------|---------|-------|---------------------------------------------------|
| Himachal Pradesh     | 2015 | Entire year   | 41,462  | 0.882 | Vital statistics                                  |
|                      | 2016 | Entire year   | 35,819  | 0.734 | Vital statistics                                  |
|                      | 2017 | Entire year   | 39,114  | 0.821 | Vital statistics                                  |
|                      | 2018 | Entire year   | 41,833  | 0.834 | Vital statistics                                  |
|                      | 2019 | Entire year   | 43,633  | 0.864 | Vital statistics                                  |
| Himachal Pradesh     | 2018 | Entire year   | 42,151  |       | Ramani                                            |
|                      | 2019 | Entire year   | 42,989  |       | Ramani                                            |
|                      | 2020 | Entire year   | 44,436  |       | Ramani                                            |
| Himachal Pradesh     | 2018 | Jan-May       | 17,759  |       | Ramani                                            |
|                      | 2019 | Jan-May       | 17,515  |       | Ramani                                            |
|                      | 2020 | Jan-May       | 16,806  |       | Ramani                                            |
|                      | 2021 | Jan-May       | 21,180  |       | Ramani                                            |
| Karnataka: Bengaluru | 2019 | Entire year   | 65,019  |       | devdatalab                                        |
|                      | 2020 | Entire year   | 75,441  |       | devdatalab                                        |
| Karnataka: Bengaluru | 2019 | Jan-June      | 31,726  |       | devdatalab                                        |
|                      | 2020 | Jan-June      | 28,830  |       | devdatalab                                        |
|                      | 2021 | Jan 1-June 15 | 87,082  |       | Chatterjee                                        |
| Karnataka            | 2015 | All           | 393,731 | 0.962 | Srivat., Vital Statistics, devdatalab (all agree) |
| Karnataka            | 2016 | All           | 420,774 | 1.000 |                                                   |
| Karnataka            | 2017 | All           | 481,747 | 1.000 |                                                   |
| Karnataka            | 2018 | All           | 483,511 | 1.000 |                                                   |
| Karnataka            | 2019 | All           | 508,584 | 1.000 |                                                   |
| Karnataka            | 2020 | All           | 551,808 |       | Srivatsa, devdatalab                              |
| Karnataka            | 2018 | Jan-June 15   | 224,000 |       | Chatterjee                                        |
| Karnataka            | 2019 | Jan-June 15   | 235,000 |       | Chatterjee                                        |
| Karnataka            | 2021 | Jan-June 15   | 337,580 |       | Chatterjee                                        |
| Karnataka            | 2015 | Jan-Aug       | 260,513 |       | devdatalab                                        |
| Karnataka            | 2016 | Jan-Aug       | 278,351 |       | devdatalab                                        |
| Karnataka            | 2017 | Jan-Aug       | 309,995 |       | devdatalab                                        |
| Karnataka            | 2018 | Jan-Aug       | 323,028 |       | devdatalab                                        |
| Karnataka            | 2019 | Jan-Aug       | 324,531 |       | devdatalab                                        |
| Karnataka            | 2020 | Jan-Aug       | 327,917 |       | devdatalab                                        |
| Karnataka            | 2021 | Jan-Aug       | 474,070 |       | karnataka.gov                                     |
| Kerala               | 2015 | Jan 1-May 31  | 95,281  |       | devdatalab                                        |
| Kerala               | 2016 | Jan 1-May 31  | 98,195  |       | devdatalab                                        |
| Kerala               | 2017 | Jan 1-May 31  | 96,534  |       | devdatalab                                        |
| Kerala               | 2018 | Jan 1-May 31  | 99,473  |       | devdatalab                                        |

|                |      |              |         |       |                  |
|----------------|------|--------------|---------|-------|------------------|
| Kerala         | 2019 | Jan 1-May 31 | 104,705 |       | devdatalab       |
| Kerala         | 2020 | Jan 1-May 31 | 95,544  |       | devdatalab       |
| Kerala         | 2021 | Jan 1-May 31 | 113,372 |       | devdatalab       |
| Kerala         | 2015 | Entire year  | 235,982 |       | Rajendran        |
| Kerala         | 2016 | Entire year  | 244,900 |       | Rajendran        |
| Kerala         | 2017 | Entire year  | 252,103 |       | Rajendran        |
| Kerala         | 2018 | Entire year  | 255,594 |       | Rajendran        |
| Kerala         | 2019 | Entire year  | 264,150 |       | Rajendran        |
| Kerala         | 2020 | Entire year  | 252,421 |       | Rajendran        |
| Kerala         | 2021 | Jan 1-May 31 | 113,372 |       | Rajendran        |
| Kerala         | 2015 | All          | 252,576 | 1.000 | Vital Statistics |
| Kerala         | 2016 | All          | 256,130 | 0.943 | Vital Statistics |
| Kerala         | 2017 | All          | 263,342 | 1.000 | Vital Statistics |
| Kerala         | 2018 | All          | 258,530 | 1.000 | Vital Statistics |
| Kerala         | 2019 | All          | 270,567 | 1.000 | Vital Statistics |
| Kerala         | 2015 | All          | 236,859 |       | lsgkerala.gov    |
| Kerala         | 2016 | All          | 244,894 |       | lsgkerala.gov    |
| Kerala         | 2017 | All          | 252,097 |       | lsgkerala.gov    |
| Kerala         | 2018 | All          | 255,571 |       | lsgkerala.gov    |
| Kerala         | 2019 | All          | 264,131 |       | lsgkerala.gov    |
| Kerala         | 2020 | All          | 242,910 |       | lsgkerala.gov    |
| Kerala         | 2021 | Jan 1-Aug 31 | 166,514 |       | lsgkerala.gov    |
| Madhya Pradesh | 2015 | All          | 311,411 | 0.538 | Vital Statistics |
| Madhya Pradesh | 2016 | All          | 338,587 | 0.609 | Vital Statistics |
| Madhya Pradesh | 2017 | All          | 370,538 | 0.687 | Vital Statistics |
| Madhya Pradesh | 2018 | All          | 424,527 | 0.788 | Vital Statistics |
| Madhya Pradesh | 2019 | All          | 493,328 | 0.891 | Vital Statistics |
| Madhya Pradesh | 2018 | Months 1-12  | 407,172 |       | LM               |
| Madhya Pradesh | 2019 | Months 1-12  | 449,819 |       | LM               |
| Madhya Pradesh | 2020 | Months 1-12  | 461,057 |       | LM               |
| Madhya Pradesh | 2018 | Months 1-5   | 152,346 |       | LM               |

|                                                     |      |             |         |       |                  |
|-----------------------------------------------------|------|-------------|---------|-------|------------------|
| Madhya Pradesh                                      | 2019 | Months 1-5  | 167,549 |       | LM               |
| Madhya Pradesh                                      | 2020 | Months 1-5  | 164,191 |       | LM               |
| Madhya Pradesh                                      | 2021 | Months 1-5  | 348,708 |       | LM               |
| Madhya Pradesh:<br>urban regions<br>of 25 districts | 2015 | Entire year | 119,068 |       | Vital Statistics |
|                                                     | 2016 | Entire year | 112,303 |       | Vital Statistics |
|                                                     | 2017 | Entire year | 113,612 |       | Vital Statistics |
|                                                     | 2018 | Entire year | 112,188 |       | Vital Statistics |
|                                                     | 2019 | Entire year | 119,914 |       | Vital Statistics |
|                                                     | 2021 | April 1-30  | 21,456  |       | Datta            |
| Maharashtra                                         | 2015 | Entire year | 673,824 | 0.975 | Vital Statistics |
| Maharashtra                                         | 2016 | Entire year | 666,448 | 0.937 | Vital Statistics |
| Maharashtra                                         | 2017 | Entire year | 647,161 | 0.931 | Vital Statistics |
| Maharashtra                                         | 2018 | Entire year | 667,900 | 0.984 | Vital Statistics |
| Maharashtra                                         | 2019 | Entire year | 693,800 | 1.000 | Vital Statistics |
| Maharashtra<br>(less 6<br>districts)                | 2018 | Entire year | 426,489 |       | Ramani           |
|                                                     | 2019 | Entire year | 462,028 |       | Ramani           |
|                                                     | 2020 | Entire year | 565,180 |       | Ramani           |
|                                                     | 2018 | Jan-May     | 177,130 |       | Ramani           |
|                                                     | 2019 | Jan-May     | 186,004 |       | Ramani           |
|                                                     | 2020 | Jan-May     | 197,676 |       | Ramani           |
|                                                     | 2021 | Jan-May     | 287,123 |       | Ramani           |
| Maharashtra:<br>Mumbai City                         | 2017 | Entire year | 89,037  |       | WM               |
|                                                     | 2018 | Entire year | 88,852  |       | WM               |
|                                                     | 2019 | Entire year | 91,123  |       | WM               |
|                                                     | 2020 | Entire year | 109,398 |       | WM               |
| Maharashtra:<br>Mumbai City                         | 2017 | Jan-May     | 36,166  |       | WM               |
|                                                     | 2018 | Jan-May     | 37,173  |       | WM               |
|                                                     | 2019 | Jan-May     | 37,363  |       | WM               |
|                                                     | 2020 | Jan-May     | 35,914  |       | WM               |
|                                                     | 2021 | Jan-May     | 45,163  |       | WM               |
| Maharashtra:<br>Nagpur City                         | 2019 | Months 4-12 | 16,238  |       | WM               |
|                                                     | 2020 | Months 4-12 | 20,382  |       | WM               |
| Odisha                                              | 2015 | All year    | 321,009 | 1.000 | Vital statistics |
| Odisha                                              | 2016 | All year    | 345,527 | 1.000 | Vital statistics |
| Odisha                                              | 2017 | All year    | 322,660 | 1.000 | Vital statistics |
| Odisha                                              | 2018 | All year    | 328,799 | 1.000 | Vital statistics |
| Odisha                                              | 2019 | All year    | 342,947 | 1.000 | Vital statistics |
| Odisha                                              | 2020 | All year    | 362,982 |       | Mohanty          |
| Odisha                                              | 2021 | Jan-Aug     | 286,623 |       | odisha.gov.in    |
| Punjab                                              | 2015 | Entire year | 199,461 | 1.000 | Vital statistics |

|                                                                             |      |             |         |       |                  |
|-----------------------------------------------------------------------------|------|-------------|---------|-------|------------------|
| Punjab                                                                      | 2016 | Entire year | 213,578 | 1.000 | Vital statistics |
| Punjab                                                                      | 2017 | Entire year | 210,398 | 1.000 | Vital statistics |
| Punjab                                                                      | 2018 | Entire year | 213,234 | 1.000 | Vital statistics |
| Punjab                                                                      | 2019 | Entire year | 215,045 | 1.000 | Vital statistics |
| Punjab                                                                      | 2015 | Entire year | 199,749 |       | Ramani           |
| Punjab                                                                      | 2016 | Entire year | 210,848 |       | Ramani           |
| Punjab                                                                      | 2017 | Entire year | 208,005 |       | Ramani           |
| Punjab                                                                      | 2018 | Entire year | 211,213 |       | Ramani           |
| Punjab                                                                      | 2019 | Entire year | 213,122 |       | Ramani           |
| Punjab                                                                      | 2020 | Entire year | 228,136 |       | Ramani           |
| Punjab                                                                      | 2015 | Jan-June    | 100,258 |       | Ramani           |
| Punjab                                                                      | 2016 | Jan-June    | 101,885 |       | Ramani           |
| Punjab                                                                      | 2017 | Jan-June    | 101,688 |       | Ramani           |
| Punjab                                                                      | 2018 | Jan-June    | 105,856 |       | Ramani           |
| Punjab                                                                      | 2019 | Jan-June    | 107,823 |       | Ramani           |
| Punjab                                                                      | 2020 | Jan-June    | 106,371 |       | Ramani           |
| Punjab                                                                      | 2021 | Jan-June    | 147,389 |       | Ramani           |
| Rajasthan                                                                   | 2015 | Entire year | 409,463 | 0.899 | Vital statistics |
| Rajasthan                                                                   | 2016 | Entire year | 416,992 | 0.933 | Vital statistics |
| Rajasthan                                                                   | 2017 | Entire year | 424,763 | 0.953 | Vital statistics |
| Rajasthan                                                                   | 2018 | Entire year | 443,173 | 0.999 | Vital statistics |
| Rajasthan                                                                   | 2019 | Entire year | 451,315 | 0.986 | Vital statistics |
| Rajasthan                                                                   | 2018 | Entire year | 216,370 |       | Ramani           |
| Rajasthan                                                                   | 2019 | Entire year | 219,814 |       | Ramani           |
| Rajasthan                                                                   | 2020 | Entire year | 229,564 |       | Ramani           |
| Rajasthan                                                                   | 2018 | Months 1-5  | 95,484  |       | Ramani           |
| Rajasthan                                                                   | 2019 | Months 1-5  | 90,366  |       | Ramani           |
| Rajasthan                                                                   | 2020 | Months 1-5  | 94,566  |       | Ramani           |
| Rajasthan                                                                   | 2021 | Months 1-5  | 125,863 |       | Ramani           |
| Tamil Nadu, 6 cities: Madurai, Coimbatore, Trichy, Vellore, Karur, Tirupur. | 2019 | Jan-May     | 10,587  |       | Nagar            |
|                                                                             | 2020 | Jan-May     | 9,432   |       | Nagar            |
|                                                                             | 2021 | Jan-May     | 18,587  |       | Nagar            |
| Tamil Nadu: Madurai District.                                               | 2019 | All         | 19,735  |       | Radhakrishnan    |
|                                                                             | 2020 | All         | 21,524  |       | Radhakrishnan    |
|                                                                             | 2019 | Jan-May     | 8,789   |       | Radhakrishnan    |
|                                                                             | 2020 | Jan-May     | 7,724   |       | Radhakrishnan    |
|                                                                             | 2021 | Jan-May     | 11,208  |       | Radhakrishnan    |
| Tamil Nadu                                                                  | 2015 | All year    | 568,271 | 1.000 | Vital Statistics |
|                                                                             | 2016 | All year    | 563,625 | 1.000 | Vital Statistics |
|                                                                             | 2017 | All year    | 580,496 | 1.000 | Vital Statistics |
|                                                                             | 2018 | All year    | 574,006 | 1.000 | Vital Statistics |
|                                                                             | 2019 | All year    | 633,897 | 1.000 | Vital Statistics |
| Tamil Nadu                                                                  | 2018 | Entire year | 549,209 |       | crstn.org        |
|                                                                             | 2019 | Entire year | 637,270 |       | crstn.org        |

|                         |           |             |         |         |                  |
|-------------------------|-----------|-------------|---------|---------|------------------|
|                         | 2020      | Entire year | 687,488 |         | crstn.org        |
|                         | 2021      | Jan-Aug     | 607,307 |         | crstn.org        |
| Tamil Nadu              | 2018      | All year    | 536,192 |         | LM; Ramani       |
|                         | 2019      | All year    | 588,221 |         | LM; Ramani       |
|                         | 2020      | All year    | 644,291 |         | LM; Ramani       |
|                         | 2018      | Jan-Aug     | 363,744 |         | LM; Ramani       |
|                         | 2019      | Jan-Aug     | 392,304 |         | LM; Ramani       |
|                         | 2020      | Jan-Aug     | 426,100 |         | LM; Ramani       |
| Tamil Nadu:<br>Chennai  | 2015      | Wks 1-52    | 59,875  |         | LM               |
|                         | 2016      | Wks 1-52    | 57,826  |         | LM               |
|                         | 2017      | Wks 1-52    | 63,726  |         | LM               |
|                         | 2018      | Wks 1-52    | 62,793  |         | LM               |
|                         | 2019      | Wks 1-52    | 67,002  |         | LM               |
|                         | 2020      | Wks 1-52    | 73,932  |         | LM               |
|                         | 2015      | Wks 1-30    | 33,691  |         | Rukmini          |
|                         | 2016      | Wks 1-30    | 33,837  |         | Rukmini          |
|                         | 2017      | Wks 1-30    | 36,056  |         | Rukmini          |
|                         | 2018      | Wks 1-30    | 35,927  |         | Rukmini          |
|                         | 2019      | Wks 1-30    | 38,145  |         | Rukmini          |
|                         | 2020      | Wks 1-30    | 40,338  |         | Rukmini          |
|                         | 2021      | Wks 1-30    | 59,129  |         | Rukmini          |
|                         | Telangana | 2015        |         | 192,857 | 0.819            |
|                         | 2016      |             | 204,917 | 0.920   | Vital Statistics |
|                         | 2017      |             | 178,345 | 0.735   | Vital Statistics |
|                         | 2018      |             | 136,528 | 0.585   | Vital Statistics |
|                         | 2019      |             | 228,294 | 0.972   | Vital Statistics |
| Telangana:<br>Hyderabad | 2016      | Jan-Dec     | 49,523  |         | LM, Ramani       |
|                         | 2017      | Jan-Dec     | 52,710  |         | LM, Ramani       |
|                         | 2018      | Jan-Dec     | 55,026  |         | LM, Ramani       |
|                         | 2019      | Jan-Dec     | 66,131  |         | LM, Ramani       |
|                         | 2020      | Jan-Dec     | 77,241  |         | LM, Ramani       |
| Telangana:<br>Hyderabad | 2016      | Jan-May     | 18,839  |         | LM, Ramani       |
|                         | 2017      | Jan-May     | 20,645  |         | LM, Ramani       |
|                         | 2018      | Jan-May     | 21,696  |         | LM, Ramani       |
|                         | 2019      | Jan-May     | 25,657  |         | LM, Ramani       |
|                         | 2020      | Jan-May     | 24,884  |         | LM, Ramani       |
|                         | 2021      | Jan-May     | 36,041  |         | LM, Ramani       |
| Uttar Pradesh           | 2015      | Entire year | 687,416 | 0.442   | Vital Statistics |
| Uttar Pradesh           | 2016      | Entire year | 608,740 | 0.402   | Vital Statistics |
| Uttar Pradesh           | 2017      | Entire year | 571,170 | 0.383   | Vital Statistics |
| Uttar Pradesh           | 2018      | Entire year | 906,653 | 0.608   | Vital Statistics |
| Uttar Pradesh           | 2019      | Entire year | 944,596 | 0.633   | Vital Statistics |
| Uttar Pradesh           | 2019      | Entire year | 773,402 |         | Bhawan           |
| Uttar Pradesh           | 2020      | Entire year | 793,505 |         | Bhawan           |
| Uttar Pradesh           | 2019      | Jan 1-Apr   | 259,316 |         | Bhawan           |

|                         |      |              |         |       |                  |
|-------------------------|------|--------------|---------|-------|------------------|
|                         |      | 30           |         |       |                  |
| Uttar Pradesh           | 2020 | Jan 1-Apr 30 | 188,747 |       | Bhawan           |
| Uttar Pradesh           | 2021 | Jan 1-Apr 30 | 333,878 |       | Bhawan           |
| West Bengal             | 2015 | Entire year  | 403,180 | 0.723 | Vital statistics |
| West Bengal             | 2016 | Entire year  | 445,540 | 0.806 | Vital statistics |
| West Bengal             | 2017 | Entire year  | 442,995 | 0.797 | Vital statistics |
| West Bengal             | 2018 | Entire year  | 490,530 | 0.908 | Vital statistics |
| West Bengal             | 2019 | Entire year  | 551,695 | 1.000 | Vital statistics |
| West Bengal             | 2018 | Entire year  | 368,477 |       | Ramani           |
| West Bengal             | 2019 | Entire year  | 410,503 |       | Ramani           |
| West Bengal             | 2020 | Entire year  | 463,858 |       | Ramani           |
| West Bengal             | 2018 | Jan-May      | 155,108 |       | Ramani           |
| West Bengal             | 2019 | Jan-May      | 167,422 |       | Ramani           |
| West Bengal             | 2020 | Jan-May      | 176,451 |       | Ramani           |
| West Bengal             | 2021 | Jan-May      | 216,972 |       | Ramani           |
| West Bengal:<br>Kolkata | 2015 | Weeks 1-52   | 62,710  |       | LM               |
|                         | 2016 | Weeks 1-52   | 65,060  |       | LM               |
|                         | 2017 | Weeks 1-52   | 69,910  |       | LM               |
|                         | 2018 | Weeks 1-52   | 68,998  |       | LM               |
|                         | 2019 | Weeks 1-52   | 69,844  |       | LM               |
|                         | 2020 | Weeks 1-52   | 74,841  |       | LM               |
| West Bengal:<br>Kolkata | 2015 | Weeks 1-20   | 25,128  |       | LM               |
|                         | 2016 | Weeks 1-20   | 24,506  |       | LM               |
|                         | 2017 | Weeks 1-20   | 26,980  |       | LM               |
|                         | 2018 | Weeks 1-20   | 25,985  |       | LM               |
|                         | 2019 | Weeks 1-20   | 29,222  |       | LM               |
|                         | 2020 | Weeks 1-20   | 27,674  |       | LM               |
|                         | 2021 | Weeks 1-20   | 33,132  |       | LM               |

LM = Local Mortality dataset (Karlinsky 2021).



The urban areas in Madhya Pradesh from which funeral counts were tabulated for April 2021 were from the following 25 districts: Barwani, Bhind, Bhopal, Burhanpur, Chhatarpur, Chhindwara, Dewas, Dhar, Gwalior, Indore, Jabalpur, Jhabua, Khandwa, Mandsaur, Morena, Neemuch, Ratlam, Sagar, Satna, Seoni, Shahdol, Shivpuri, Singroli, Tikamgarh, Vidisha (Datta 2021).

**Supplemental Table S3. Covid-19 Deaths Based on Viral Testing and Clinical Symptoms, as Tabulated by Johns Hopkins University.**

| Region.                          | Population    | Reported Covid Deaths in 2020 | Deaths/100K in 2020 | Reported Covid deaths by August 31, 2021. | Deaths/100K in 2021 (as of August 31) |
|----------------------------------|---------------|-------------------------------|---------------------|-------------------------------------------|---------------------------------------|
| Andhra Pradesh                   | 53,903,393    | 7,104                         | 13.179              | 13,838                                    | 12.493                                |
| Assam                            | 35,607,039    | 1,043                         | 2.929               | 5,655                                     | 12.952                                |
| Bihar                            | 124,799,930   | 1,393                         | 1.116               | 9,653                                     | 6.619                                 |
| Chandigarh                       | 11,584,730    | 316                           | 2.728               | 813                                       | 4.290                                 |
| Delhi                            | 18,710,920    | 10,523                        | 56.240              | 25,081                                    | 77.805                                |
| Gujarat                          | 63,872,400    | 4,302                         | 6.735               | 10,081                                    | 9.048                                 |
| Haryana                          | 28,204,692    | 2,899                         | 10.278              | 9,675                                     | 24.024                                |
| Himachal Pradesh                 | 7,451,955     | 931                           | 12.493              | 3,595                                     | 35.749                                |
| Karnataka                        | 67,562,700    | 12,081                        | 17.881              | 37,293                                    | 37.316                                |
| Kerala                           | 35,699,440    | 3,042                         | 8.521               | 20,673                                    | 49.387                                |
| Madhya Pradesh                   | 85,358,970    | 3,595                         | 4.212               | 10,516                                    | 8.108                                 |
| Maharashtra                      | 123,144,200   | 49,463                        | 40.167              | 137,209                                   | 71.255                                |
| Odisha                           | 46,356,334    | 1,871                         | 4.036               | 7,901                                     | 13.008                                |
| Punjab                           | 30,141,373    | 5,331                         | 17.687              | 16,373                                    | 36.634                                |
| Rajasthan                        | 81,032,689    | 2,689                         | 3.318               | 8,954                                     | 7.731                                 |
| Tamil Nadu                       | 77,841,270    | 12,109                        | 15.556              | 34,899                                    | 29.278                                |
| Telangana                        | 39,362,732    | 1,541                         | 3.915               | 3,872                                     | 5.922                                 |
| Uttar Pradesh                    | 237,882,725   | 8,352                         | 3.511               | 22,820                                    | 6.082                                 |
| West Bengal                      | 99,609,300    | 9,683                         | 9.721               | 18,434                                    | 8.785                                 |
| Total, except Uttar Pradesh      | 1,030,244,067 | 129,916                       | 12.610              | 374,515                                   | 23.742                                |
| Total, except Utt. Prad. & Assam | 994,637,028   | --                            | --                  | 368,860                                   | 24.128                                |
| Total, except Assam              | 1,232,519,753 | --                            | --                  | 391,680                                   | 20.645                                |
| Total                            | 1,268,126,792 | 138,268                       | 10.903              | 397,335                                   | 20.429                                |

This table lists absolute and per-capita reported Covid-19 deaths, rather than excess deaths.

**Supplemental Table S4. Range of Estimated Covid-19 Deaths in India, 2020 through August 2021.**

| State                     | Population    | Estimate Type. | 2020            |         | 2021, by August 31 |           |
|---------------------------|---------------|----------------|-----------------|---------|--------------------|-----------|
|                           |               |                | Deaths/<br>100K | Deaths  | Deaths/<br>100K    | Deaths    |
| Andhra Prad.              | 53,903,393    | --             | 121.501         | 65,493  | 321.772            | 173,446   |
| Assam                     | 35,607,039    | --             | 42.819          | 15,246  | --                 | --        |
| Bihar                     | 124,799,930   | --             | 107.567         | 134,244 | 101.272            | 126,388   |
| Chandigarh                | 11,584,730    | --             | 2.728           | 316     | 4.290              | 813       |
| Delhi                     | 18,710,920    | --             | 56.240          | 10,523  | 230.342            | 43,099    |
| Gujarat                   | 63,872,400    | Low            | 6.735           | 4,302   | 36.417             | 23,260    |
|                           |               | High           | 182.464         | 116,544 | 430.389            | 274,900   |
| Haryana                   | 28,204,692    | --             | 39.311          | 11,087  | 145.458            | 41,026    |
| Himachal Pradesh          | 7,451,955     | --             | 12.493          | 931     | 39.930             | 2,976     |
| Karnataka                 | 67,562,700    | Low            | 18.689          | 12,627  | 165.588            | 111,876   |
|                           |               | High           | 77.103          | 52,093  | 648.291            | 438,003   |
| Kerala                    | 35,699,440    | --             | 8.521           | 3,042   | 49.387             | 17,631    |
| Madhya Pradesh            | 85,358,970    | Low            | 4.212           | 3,595   | 46.376             | 39,586    |
|                           |               | High           | 4.212           | 3,595   | 212.232            | 181,159   |
| Maharashtra               | 123,144,200   | Low            | 100.540         | 103,152 | 71.255             | 137,209   |
|                           |               | High           | 172.308         | 212,187 | 102.288            | 104,946   |
| Odisha                    | 46,356,334    | --             | 43.220          | 20,035  | 125.631            | 58,238    |
| Punjab                    | 30,141,373    | --             | 17.687          | 5,331   | 120.255            | 36,247    |
| Rajasthan                 | 81,032,689    | --             | 8.181           | 6,629   | 39.874             | 32,311    |
| Tamil Nadu                | 77,841,270    | Low            | 15.556          | 12,109  | 76.508             | 59,555    |
|                           |               | High           | 92.563          | 72,052  | 270.866            | 210,846   |
| Telangana                 | 39,362,732    | --             | 88.157          | 34,701  | 71.768             | 28,250    |
| Uttar Prad.               | 237,882,725   | --             | 3.511           | 8,352   | 20.371             | 48,458    |
| West Bengal               | 99,609,300    | Low            | 46.145          | 45,965  | 49.315             | 49,122    |
|                           |               | High           | 53.564          | 53,355  | 64.514             | 64,262    |
| Total, except Uttar Prad. | 1,030,244,067 | Low            | 47.496          | 489,328 | --                 | --        |
|                           |               | High           | 79.341          | 817,404 | --                 | --        |
| Total, except Uttar Prad. | 994,637,028   | Low            | --              | --      | 98.632             | 981,033   |
|                           |               | High           | --              | --      | 184.443            | 1,834,540 |
| Total                     | 1,268,126,792 | Low            | 39.245          | 497,680 | --                 | --        |
|                           |               | High           | 65.116          | 825,756 | --                 | --        |
|                           | 1,232,519,753 | Low            | --              | --      | 83.527             | 1,029,491 |
|                           |               | High           | --              | --      | 152.776            | 1,882,998 |

All estimates based on excess deaths, except 2020 Delhi, Kerala, and Punjab data, which are based on known Covid-19 mortality as reported by Johns Hopkins University, and Gujarat, West Bengal, Madhya Pradesh, and Tamil Nadu, which included the Hopkins data as the low end of the uncertainty range.

## Supplemental References.

Alavi AM. NDTV. Bihar Saw Nearly 75,000 Unaccounted Deaths Amid 2nd Covid Wave, Data Shows. June 19, 2021. Available from: [https://www.ndtv.com/india-news/bihar-saw-nearly-75-000-unaccounted-deaths-amid-2nd-covid-wave-data-shows-2467778?pfrom=home-ndtv\\_topscroll](https://www.ndtv.com/india-news/bihar-saw-nearly-75-000-unaccounted-deaths-amid-2nd-covid-wave-data-shows-2467778?pfrom=home-ndtv_topscroll) Accessed June 20, 2021.

Anparthi A. 128 more deaths than normal ones, Covid fatalities in Dec '20 [in Nagpur]. Times of India. January 21, 2021. Available from: <https://timesofindia.indiatimes.com/city/nagpur/128-more-deaths-than-normal-ones-covid-fatalities-in-dec-20/articleshow/80373223.cms> Accessed June 16, 2021.

Banaji M. Indian All-Cause Mortality Data. Available from: <https://github.com/muradbanaji/IndiaACMdata> Accessed September 8, 2021.

Bhawan S. Deputy Chief Registrar. Vital Dept (Birth & Death). Government of Uttar Pradesh. Information furnished for RTI [requested by Saurav Das]. June 2, 2021.

Chatterjee S. Karnataka recorded 1.02 lakh 'excess' deaths in 2021, 5 times the COVID-19 toll. The News Minute. June 15, 2021. Available from: <https://www.thenewsminute.com/article/karnataka-recorded-102-lakh-excess-deaths-2021-5-times-covid-19-toll-150761> Accessed June 16, 2021.

Das S. Death Count In 24 UP Districts 43 Times More Than Official Covid-19 Toll. Article14. June 21, 2021. Available from: <https://article-14.com/post/untitled-60cf605395758> Accessed June 21, 2021.

Datta S. Madhya Pradesh Excess Deaths in April: An Alternative Count Using Funeral Data. Thewire.in. June 22, 2021. Available from: <https://science.thewire.in/health/madhya-pradesh-excess-deaths-covid-19-april-2021-funeral-data/> Accessed June 26, 2021.

Dave K. Year of pandemic? Gujarat records 11% less deaths than in 2019. Times of India. December 13, 2020. Available from: <https://timesofindia.indiatimes.com/city/ahmedabad/year-of-pandemic-gujarat-records-11-less-deaths-than-in-2019/articleshow/79704719.cms> Accessed June 19, 2021.

Debroy S. 13,000 more deaths in Mumbai this year between March & September. Times of India. October 29, 2020. Available from: <https://timesofindia.indiatimes.com/city/mumbai/13k-more-deaths-in-city-this-year-between-march-sept/articleshow/78920631.cms> Accessed June 27, 2021.

Desai D. 61k Covid deaths not counted in Gujarat: Report. Hindustan Times. May 15, 2021. Available from: <https://www.hindustantimes.com/india-news/61k-covid-deaths-not-counted-in-gujarat-report-101621027267608.html> Accessed June 14, 2021.

Government of India. Office of the Registrar General. Ministry of Home Affairs. Vital Statistics of India. Based on the Civil Registration System. 2019. June 2021. Available from: <https://crsorgi.gov.in/web/uploads/download/CRS%202019%20report.pdf>

Accessed June 18, 2021.

Government of India. Office of the Registrar General. Ministry of Home Affairs. Vital Statistics of India. Based on the Civil Registration System. 2018. June 2020.

[https://censusindia.gov.in/2011-Common/CRS\\_2018/crs2018\\_20072020.pdf](https://censusindia.gov.in/2011-Common/CRS_2018/crs2018_20072020.pdf)

Accessed June 18, 2021.

Government of India. Office of the Registrar General. Ministry of Home Affairs. Vital Statistics of India. Based on the Civil Registration System. 2015. June 2017. Available from: [https://censusindia.gov.in/2011-Documents/CRS\\_Report/crs\\_report%202015\\_23062017.pdf](https://censusindia.gov.in/2011-Documents/CRS_Report/crs_report%202015_23062017.pdf) Accessed June 18, 2021.

Government of India. Office of the Registrar General. Ministry of Home Affairs. Vital Statistics of India. Based on the Civil Registration System. 2016. June 2018. Available from: [https://censusindia.gov.in/2011-Documents/CRS\\_Report/CRS%20FINAL%20REPORT%202016\\_21062018.pdf](https://censusindia.gov.in/2011-Documents/CRS_Report/CRS%20FINAL%20REPORT%202016_21062018.pdf)

Accessed June 18, 2021.

Government of Karnataka. Annual Report on the Registration of Births and Deaths Act, 1969. [2015-2019]. Available from: <https://ejanma.karnataka.gov.in/frmVitalSat.aspx>

Accessed September 1, 2021.

Government of Karnataka. Office of the Chief Registrar of Births and Deaths. Registration Details. Available from:

[https://ejanma.karnataka.gov.in/frmTransaction\\_Details.aspx](https://ejanma.karnataka.gov.in/frmTransaction_Details.aspx) Accessed September 1, 2021.

Government of Kerala. Civil Registrations. June 20, 2021. Available from: <https://cr.lsgkerala.gov.in/Pages/map.php> Accessed September 1, 2021.

Government of Odisha. Health and Family Welfare Department. Birth and Death Odisha. Available from: <https://www.birthdeath.odisha.gov.in/#/home> Accessed September 1, 2021.

Government of Tamil Nadu. Birth and Death Registration. June 27, 2021 [in India]. Available from: [http://www.crstn.org/birth\\_death\\_tn/MisRep.jsp](http://www.crstn.org/birth_death_tn/MisRep.jsp) Accessed September 1, 2021.

[The Hindu] Special Correspondent. 32% increase in mortality rate in Bengaluru: Patil. The Hindu. Sep. 3, 2020. Available from: <https://www.thehindu.com/news/national/karnataka/32-increase-in-mortality-rate-in-bengaluru-patil/article32509298.ece> Accessed: June 16, 2021.

Hindustan Times Correspondent. What do Delhi's death registration figures tell us about Covid-19 death toll? Hindustan Times. June 4, 2021. Available from: <https://www.msn.com/en-in/news/other/what-do-delhi-s-death-registration-figures-tell-us-about-covid-19-death-toll/ar-AAKHLUM> Accessed June 6, 2021.

IANS. COVID-19 year 2021 sees 1.4L more deaths than 2019 in Tamil Nadu, says a study by NGO [Arappor Iyakkam]. The Free Press Journal. June 26, 2021. Available from: <https://www.freepressjournal.in/india/covid-19-year-2021-sees-14l-more-deaths-than-2019-in-tamil-nadu-says-a-study-by-ngo> Accessed June 26, 2021.

Jalihal S, Sethi T, Sethi N. Gujarat: Data from death registers suggests COVID toll undercounted by 27 times. The Wire. August 17, 2021. Available from: <https://thewire.in/health/gujarat-data-death-registers-covid-19-toll-undercounted-27-times> Accessed September 11, 2021.

Khanna S. Other deaths spike in Indian city [Ahmedabad] ravaged by coronavirus. Reuters. July 2, 2020. Available from: <https://www.reuters.com/article/us-health-coronavirus-india-casualties-idUSKBN24311A> Accessed June 16, 2021.

Menon JC, Rakesh PS, Bharti OK, Mishra K, Swain BK, Raina SK, John D, Janakiraman C, Banerjee A. COVID-19 and all-cause-mortality; differential trends between countries and selected states of India. April 15, 2021. Available from: <https://www.researchsquare.com/article/rs-361210/v1> Accessed September 6, 2021.

Mohanty D. Odisha: 20,035 excess deaths in 2020 amid Covid deaths underreporting cloud. Hindustan Times. September 12, 2021. Available from: <https://www.hindustantimes.com/india-news/odisha-20-035-excess-deaths-in-2020-amid-covid-deaths-underreporting-cloud-101631417118338.html> Accessed September 12, 2021.

Nagar T. Citizen's Research Report on Covid Deaths in TamilNadu. Report by Arappor Iyakkam. June 15, 2021. Available from: [https://arappor.org/public/Document/20210615\\_Citizensreport\\_Coronadeath\\_withAnnexure.pdf](https://arappor.org/public/Document/20210615_Citizensreport_Coronadeath_withAnnexure.pdf) Accessed June 16, 2021.

OpIndia Staff. Gujarat: Here's why the death certificate stats from March to May so far do not prove allegations of massive undercounting of Covid deaths. OpIndia. May 15, 2021. Available from: <https://www.opindia.com/2021/05/gujarat-covid-19-deaths-death-certificate-statistics-divya-bhaskar/> Accessed June 14, 2021. [Has Gujarat and Ahmedabad data.]

Radhakrishnan S. Is Madurai undercounting Covid deaths? Data raise questions. The New Indian Express. June 18, 2021. Available from: <https://www.newindianexpress.com/states/tamil-nadu/2021/jun/18/is-madurai-undercounting-covid-deaths-data-raise-questions-2317785.html> Accessed June 17, 2021.

Radhakrishnan V. 'Excess deaths' in Delhi two times official COVID-19 toll. The Hindu. September 3, 2021. Available from: <https://www.thehindu.com/news/cities/Delhi/excess-deaths-in-delhi-two-times-official-covid-19-toll/article36279423.ece> Accessed September 8, 2021.

Rajendran D, Kurian S. TNM Exclusive: Kerala reports around 14,000 excess deaths till end of May 2021. The News Minute. Available from: <https://www.thenewsminute.com/article/tnm-exclusive-kerala-reports-almost-14000-excess-deaths-till-end-may-2021-151124> Accessed June 23, 2022.

Ramani S, Radhakrishnan V. Excess deaths in Hyderabad are 10 times the official COVID-19 toll for Telangana. The Hindu. June 14, 2021. Available from: <https://www.thehindu.com/news/cities/Hyderabad/excess-deaths-in-hyderabad-are-10-times-the-official-covid-19-toll-for-telangana/article34807214.ece> Accessed June 14, 2021.

Ramani S, Radhakrishnan V. Number of death certificates issued by GHMC in a month. Available from: [https://docs.google.com/spreadsheets/d/1wP1SOEHclYOmA2hokjBzjCAO\\_eqpvx9LPftxDokv1zq/edit#gid=0](https://docs.google.com/spreadsheets/d/1wP1SOEHclYOmA2hokjBzjCAO_eqpvx9LPftxDokv1zq/edit#gid=0) Accessed June 14, 2021.

Ramani S, Kannan R. Excess deaths in Tamil Nadu over four times official COVID-19 tally. The Hindu. June 16, 2021. <https://www.thehindu.com/news/national/tamil-nadu/excess-deaths-in-tamil-nadu-over-four-times-official-covid-19-tally/article34834150.ece?homepage=true> Accessed June 17, 2021.

Ramani S. Excess deaths in Rajasthan are at least five times the official COVID-19 tally. The Hindu. July 4, 2021. Available from: <https://www.thehindu.com/news/national/excess-deaths-in-rajasthan-are-five-times-the-official-covid-19-tally/article35118826.ece> Accessed July 23, 2021.

Ramani S. 'Excess deaths' in Haryana seven times official COVID-19 toll. The Hindu. July 14, 2021. Available from: <https://www.thehindu.com/news/national/excess-deaths-in-haryana-seven-times-official-covid-19-toll/article35329023.ece> Accessed July 24, 2021.

Ramani S, Vasudeva V. Punjab 'excess deaths' three times official toll. The Hindu. July 30, 2021. Available from: <https://www.thehindu.com/news/national/coronavirus-punjab-excess-deaths-three-times-official-toll/article35641394.ece?homepage=true> Accessed July 31, 2021.

Ramani S. Himachal Pradesh 'excess deaths' twice the official COVID-19 toll. The Hindu. July 21, 2021. Available from: <https://www.thehindu.com/news/national/himachal-pradesh-excess-deaths-twice-the-official-covid-19-toll/article35430252.ece> Accessed July 31, 2021.

Ramani S. Excess deaths in West Bengal 11 times official COVID-19 tally. The Hindu. July 25, 2021. Available from: <https://www.thehindu.com/news/national/other-states/excess-deaths-in-west-bengal-11-times-official-covid-19-tally/article35526895.ece> Accessed July 31, 2021.

Ramani S. Excess deaths in Maharashtra were at least 3 times the official COVID toll. The Hindu. August 3, 2021. Available from: <https://www.thehindu.com/news/national/excess-deaths-in-maharashtra-were-at-least-3-times-the-official-covid-toll/article35708965.ece> Accessed August 3, 2021.

Rukmini S. Madhya Pradesh saw nearly three times more deaths than normal after second wave of Covid-19 struck. Scroll.In. June 12, 2021. Available from: <https://scroll.in/article/996772/madhya-pradesh-saw-nearly-three-times-more-deaths-than-normal-after-second-wave-of-covid-19-struck> Accessed June 12, 2021.

Rukmini S. Andhra Pradesh saw 400% increase in deaths in May, Tamil Nadu saw more modest excess mortality. Scroll.In. June 13, 2021. Available from: <https://scroll.in/article/997427/andhra-pradesh-saw-400-increase-in-deaths-in-may-tamil-nadu-saw-more-modest-excess-mortality> Accessed June 13, 2021. ["AP"]

Rukmini S. How India Could Fill In The Blanks On Excess Mortality. India Spend. June 17, 2020. Available from: <https://www.indiaspend.com/how-india-could-fill-in-the-blanks-on-excess-mortality/> Accessed June 27, 2021.

Rukmini S. Daily Registered Deaths in Chennai. Chennai Municipal Corporation. Available from: [https://github.com/elseasama/covid19chennai/tree/gh-pages/chennai\\_data](https://github.com/elseasama/covid19chennai/tree/gh-pages/chennai_data) Accessed September 7, 2021.

Saikia A. Assam saw 28,000 more deaths than normal in months when first wave of Covid-19 struck. Scroll.in. June 16, 2021. Available from: <https://scroll.in/article/997683/assam-saw-28000-more-deaths-than-normal-in-months-when-first-wave-of-covid-19-struck> Accessed June 17, 2021.

Scroll Staff. Gujarat is undercounting Covid-19 deaths, shows 'Divya Bhaskar' report. Scroll.In. May 14, 2021. Available from: <https://scroll.in/latest/994906/gujarat-is-undercounting-covid-19-deaths-shows-divya-bhaskar-report> Accessed June 6, 2021.

Srivatsa SS, Ramani S. Karnataka's excess deaths nearly 6 times official COVID-19 toll. The Hindu. June 20, 2021. Available from: <https://www.thehindu.com/news/national/excess-deaths-in-karnataka-nearly-six-times-official-covid-19-tally/article34870624.ece> Accessed June 21, 2021.

Srivatsa SS, Ramani S. Number of deaths registered in CRS system of Karnataka. June 21, 2021. Available from: <https://docs.google.com/spreadsheets/d/1pBM4wFuGQgnL6syAG3IFHGUK9yzc4pToSv2fttKEIxY/edit#gid=0> Accessed June 21, 2021.



Wall of Grief. The Reporters Collective, National Foundation of India. Gujarat Municipality Death Registers. September 2021. Available from: <https://www.wallofgrief.org/> Accessed September 11, 2021.
